# Supplementary material for: Defective ZrO2−x supported Ru nanoparticles as a Mott–Schottky photocatalyst for efficient ammonia synthesis under ambient conditions
Source: Royal Society of Chemistry journal article supplement (doi:10.1039/d3gc02130k), 2023-01-01
Supplement: d3gc02130k1.pdf [file d3gc02130k1.pdf]

## Supporting Information

### **Defect ZrO<sub>2-x</sub> supported Ru nanoparticles as Mott-Schottky photocatalyst for efficient ammonia synthesis at ambient conditions**

Rong Fu<sup>\*a, b, c</sup>, Yan Wang<sup>a, b</sup>, Guangming Wang<sup>d</sup>, Qingyun Zhan<sup>c</sup>, Lili Zhang<sup>c</sup>, Le

Liu<sup>c</sup>

<sup>a</sup> School of Chemistry and Chemical Engineering, Liaocheng University,  
Liaocheng 252000, P. R. China

<sup>b</sup> Shandong Provincial Key Laboratory of Chemical Energy Storage and Novel  
Cell Technology, Liaocheng University, Liaocheng 252000, P. R. China

<sup>c</sup> State Key Laboratory of Inorganic Synthesis and Preparative Chemistry, College of  
Chemistry Jilin University, Changchun 130012, P. R. China

<sup>d</sup> Institute of Technology for Carbon Neutrality, Shenzhen Institute of Advanced  
Technology, Chinese Academy of Sciences Shenzhen, Shenzhen 518055, P. R. China

\*Corresponding author's email: furong@lcu.edu.cn

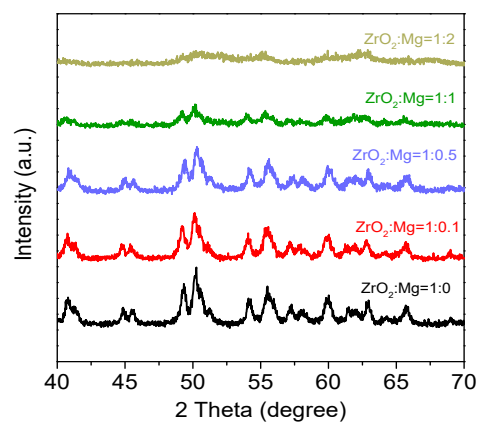

**Fig. S1** Powder XRD patterns of ZrO<sub>2</sub> and various ZrO<sub>2-x</sub> samples prepared with different molar ratio of ZrO<sub>2</sub> and Mg powder.

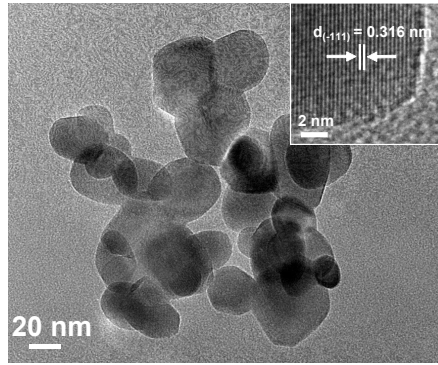

**Fig. S2** TEM image of  $\text{ZrO}_2$ . The inset shows the High-Resolution TEM image of  $\text{ZrO}_2$ .

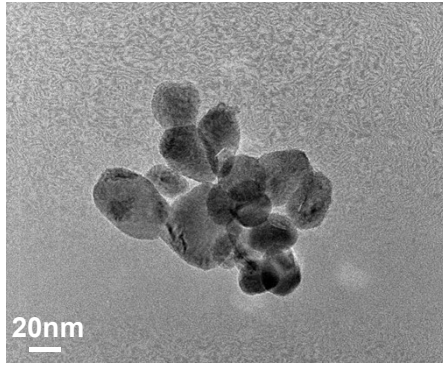

**Fig. S3** TEM image of  $\text{ZrO}_{2-x}$ .

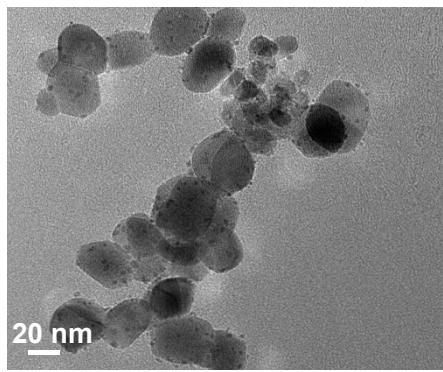

**Fig. S4** TEM image of Ru@ZrO<sub>2</sub>.

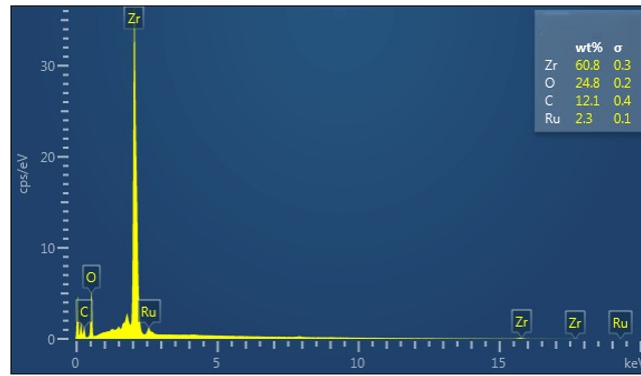

**Fig. S5** EDS spectrum of Ru@ZrO<sub>2-x</sub>.

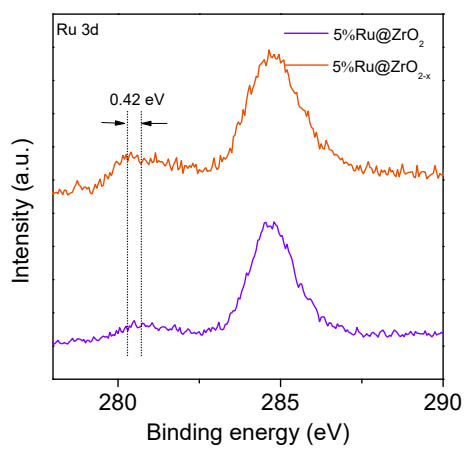

**Fig. S6** XPS spectra of Ru 3d for Ru@ZrO<sub>2</sub> and Ru@ZrO<sub>2-x</sub>.

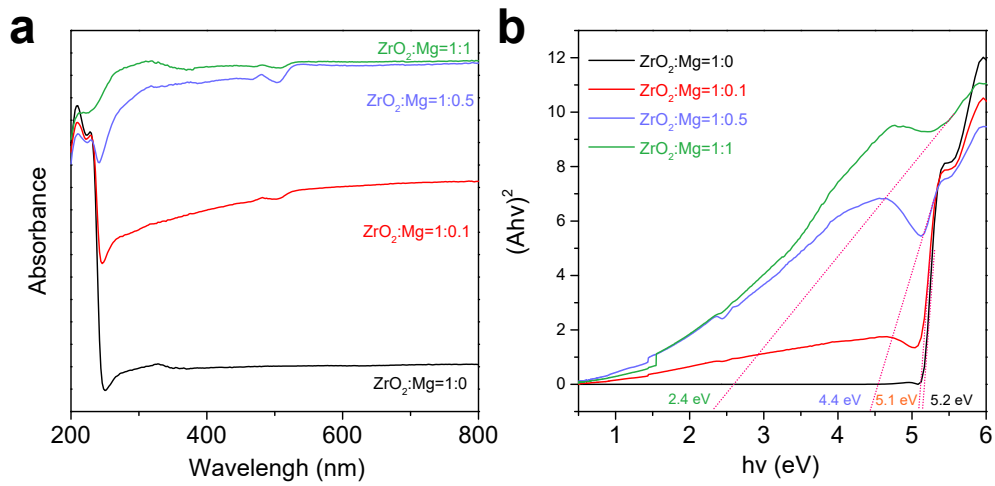

**Fig. S7** (a) UV-VIS absorbance spectra of  $ZrO_2$  and various  $ZrO_{2-x}$  samples prepared with different molar ratio of  $ZrO_2$  and Mg power. (b) Band gap calculated from the fitting line using the Schuster-Kubelka-Munk equation with  $ZrO_2$  and  $ZrO_{2-x}$  prepared with different molar ratio of  $ZrO_2$  and Mg power.



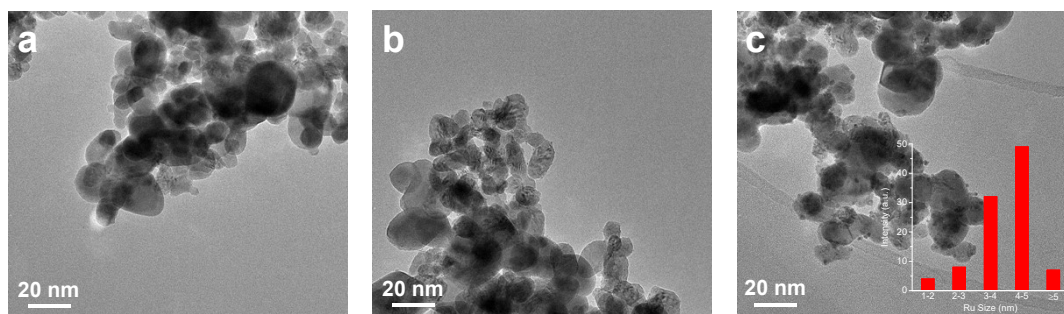

**Fig. S8** TEM images of the as-synthesized (a) 1%Ru@ZrO<sub>2-x</sub>, (b) 2%Ru@ZrO<sub>2-x</sub>, (c) 10%Ru@ZrO<sub>2-x</sub>, the inset histogram shows the diameter distributions of Ru nanoparticles.

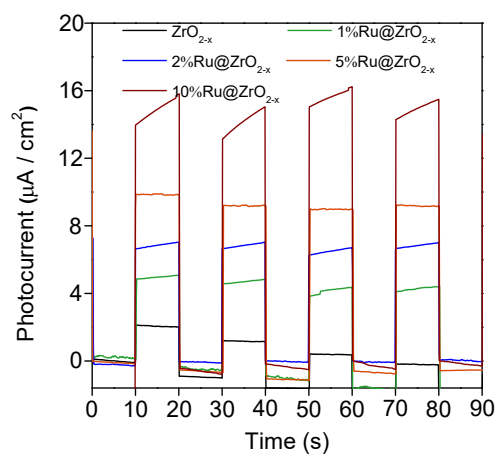

**Fig. S9** The photocurrent responses of  $\text{ZrO}_{2-x}$ , 1%Ru@ $\text{ZrO}_{2-x}$ , 2%Ru@ $\text{ZrO}_{2-x}$ , 5%Ru@ $\text{ZrO}_{2-x}$  and 10%Ru@ $\text{ZrO}_{2-x}$ .

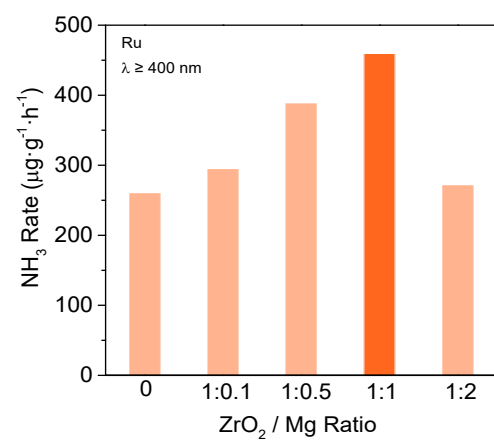

**Fig. S10** Ammonia rate of catalysts prepared at different ZrO<sub>2</sub>/Mg molar ratios with Ru nanoparticles.

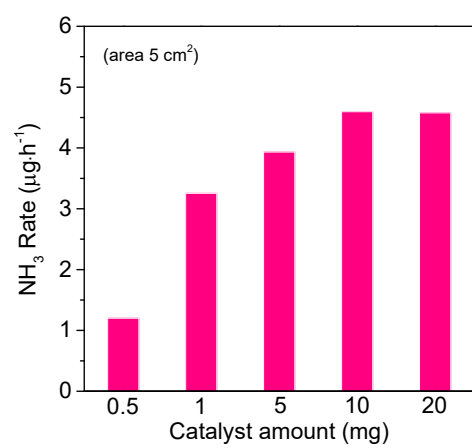

**Fig. S11** Ammonia synthesis rate of Ru@ZrO<sub>2-x</sub> with different catalyst dosages.

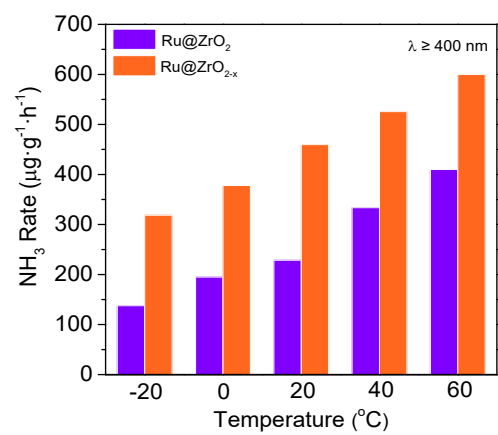

**Fig. S12** The ammonia synthesis rate of Ru@ZrO<sub>2</sub> and Ru@ZrO<sub>2-x</sub> with different temperatures.

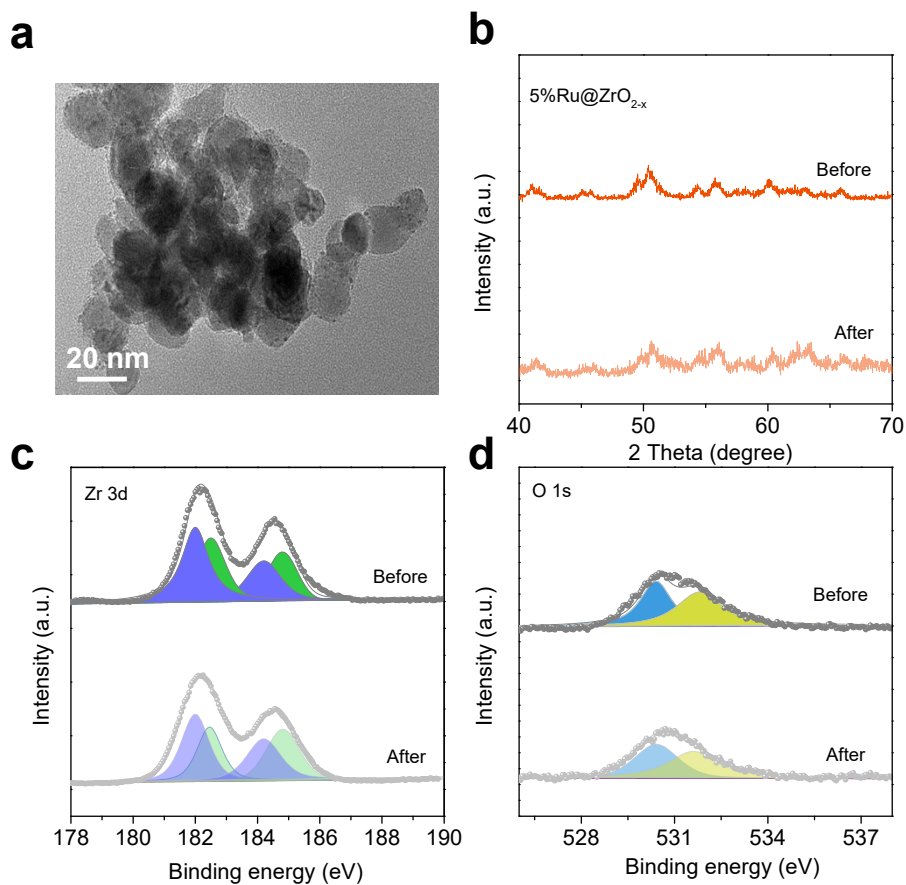

**Fig. S13** Sample characterizations of 5%Ru@ZrO<sub>2-x</sub> after five cyclic tests for photocatalytic N<sub>2</sub> fixation: (a) TEM image; (b) XRD pattern; (c) XPS spectra of Zr 3d for 5%Ru@ZrO<sub>2-x</sub>; (d) XPS spectra of O 1s for 5%Ru@ZrO<sub>2-x</sub>.

In the associative mechanism of photocatalytic N<sub>2</sub> reduction, a continuous N<sub>2</sub> photoreductive protonation process is indispensable. The photogenerated holes will be neutralized by H<sub>2</sub> to form protons. Specifically:

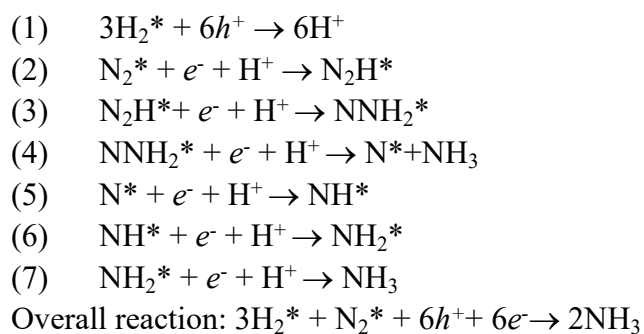

**Fig. S14** Schematic diagram of the photocatalytic mechanism.

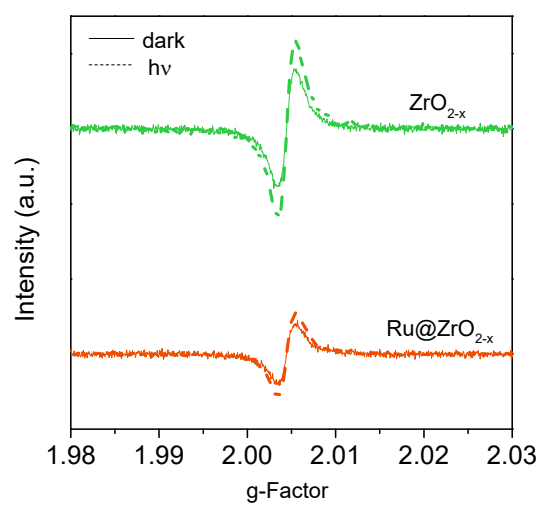

**Fig. S15** In situ EPR spectra of  $ZrO_{2-x}$  and  $Ru@ZrO_{2-x}$  under light irradiation in the presence of  $N_2$  and  $H_2$ .



**Table S1.** The peaks parameters of O 1s for ZrO<sub>2</sub> and ZrO<sub>2-x</sub>.

| Sample                                            | Name      | BE (eV) | Area  | O <sub>v</sub> /O <sub>L</sub> +O <sub>v</sub> |
|---------------------------------------------------|-----------|---------|-------|------------------------------------------------|
| ZrO <sub>2</sub>                                  | O-Lattice | 530.3   | 58970 | 15.5%                                          |
|                                                   | O-Vacancy | 531.9   | 10800 |                                                |
| ZrO <sub>2-x</sub><br>(ZrO <sub>2</sub> : Mg=1:1) | O-Lattice | 530.3   | 25993 | 55.4%                                          |
|                                                   | O-Vacancy | 531.9   | 32264 |                                                |

**Table S2.** The peaks parameters of  $E_g$ ,  $E_{CB}$ ,  $E_{VB}$ ,  $E_f$ , and (vs Vacuum) for  $ZrO_2$  and  $ZrO_{2-x}$ .

| Sample      | $E_g$ (eV) | $E_{CB}$ (eV) | $E_{VB}$ (eV) | $E_f$ (eV) |
|-------------|------------|---------------|---------------|------------|
| $ZrO_2$     | 5.2        | -3.87         | -9.07         | -6.77      |
| $ZrO_{2-x}$ | 2.4        | -3.75         | -6.25         | -4.35      |

### Determination of band edge positions of $ZrO_2$ and $ZrO_{2-x}$ .

Relative  $E_{VB}$  positions were determined by the VB-XPS, and both  $ZrO_2$  and  $ZrO_{2-x}$  exhibited an edge value of 2.3 eV and 2.1 eV.  $E_{CB}$  positions were calculated from Mott-Schottky plots, the flat-band potential values for  $ZrO_2$  and  $ZrO_{2-x}$  were -0.71 V and -0.83 V (vs SCE), respectively. As SHE (V) can be transformed to physical scale (eV) according to  $E_{phys} = - (E_{SHE} + 4.44)$ , the flat-band potentials were located at -3.97 and -3.85 eV for  $ZrO_2$  and  $ZrO_{2-x}$ , respectively. The values calculated were usually 0.1 eV higher than the flat band potential, the CB positions ( $E_{CB}$ ) of  $ZrO_2$  and  $ZrO_{2-x}$  were -3.87 and -3.75 eV (vs Vacuum). After calculating the bandgap ( $E_g$ ) of  $ZrO_2$  (5.2 eV) and  $ZrO_{2-x}$  (2.4 eV) from the UV-Vis-NIR spectra,  $E_{VB}$  positions were also determined through  $E_{VB} = E_{CB} - E_g$  [1]. The peaks parameters of  $E_g$ ,  $E_{CB}$ ,  $E_{VB}$ ,  $E_f$ , and (vs Vacuum) for  $ZrO_2$  and  $ZrO_{2-x}$  were shown Table S2.

## **The apparent electron carrier concentrations**

The apparent electron carrier concentrations of different catalysts can be calculated by Mott-Schottky curve and formula.

$$N_d = (2/e\epsilon\epsilon_0) [d(1/C^2)/dV]^{-1}$$

Where  $e$  is the electron charge,  $\epsilon_0$  is the vacuum permittivity,  $\epsilon$  is the relative dielectric constant of the semiconductor material.  $C$  is the interfacial capacitance between the semiconductor and the electrolyte.  $d(1/C^2)/dV$  represents the slope of the approximately linear part of the Mott Schottky curve.

**Table S3.** Representative works on photocatalytic nitrogen fixation.

| Catalysts                              | Conditions                              | Temperature (K) | NH <sub>3</sub> rate ( $\mu\text{g g}^{-1} \text{h}^{-1}$ ) | Ref.             |
|----------------------------------------|-----------------------------------------|-----------------|-------------------------------------------------------------|------------------|
| 2%Ru@F-TiO <sub>2-x</sub>              | Visible light (400-800nm)               | 293             | 118.5                                                       | S2               |
| 2%Ru@WO <sub>3-x</sub>                 | Visible light (400-800 nm)              | 293             | 27                                                          | S2               |
| 2%Ru@CeO <sub>2-x</sub>                | Visible light (400-800 nm)              | 293             | 32                                                          | S2               |
| Defect TiO <sub>2</sub>                | $\lambda \geq 280 \text{ nm}$           | 313             | 12.41                                                       | S3               |
| 3%FePt@g-C <sub>3</sub> N <sub>4</sub> | Visible light (400-800 nm)              | 293             | 63                                                          | S4               |
| Fe-Al@graphene                         | UV light ( $\lambda < 400 \text{ nm}$ ) | 473             | 430.1                                                       | S5               |
| Ru@Ti-ZnO                              | Visible light (400-800 nm)              | 293             | ~240                                                        | S6               |
| Ru@ZrO <sub>2-x</sub>                  | Visible light (400-800 nm)              | 293             | 460                                                         | <i>This work</i> |
| Film-Ru@ZrO <sub>2-x</sub>             | Visible light (400-800 nm)              | 293             | 3256                                                        | <i>This work</i> |

## Supplementary References

- [S1] C. Mao, L. Yu, J. Li, J. Zhao and L. Zhang., *Appl. Catal. B*, 2018, **224**, 612-620.
- [S2] R. Fu, Z. W. Wu, Z. Y. Pan, Z. Y. Gao, Z. Li, X. H. Kong and L. Li, *Angew. Chem. Int. Ed.*, 2021, **60**, 11173-11179.
- [S3] H. Hirakawa, M. Hashimoto, Y. Shiraishi and T. Hirai, *J. Am. Chem. Soc.*, 2017, **139**, 10929-10936.
- [S4] Z. Li, Z. Y. Gao, B. W. Li, L. L. Zhang, R. Fu, Y. Li, X. Y. Mu and L. Li, *Appl. Catal. B*, 2020, **262**, 118276.
- [S5] Y. Yang, T. Zhang, Z. Ge, Y. Lu and Y. Chen, *Carbon*, 2017, **124**, 72.
- [S6] Z. Li, Z. Y. Pan, S. Cai, Z. Y. Gao, Z. L. Li, R. Fu, Z. H. Zhao, X. Y. Mu and L. Lu, *ACS Sustainable Chem. Eng.*, 2021, **9**, 13630-13639.
